# Supplementary material
Source: PubMed Central journal article supplement (PMC4449804)

# Panels for Figure 5b

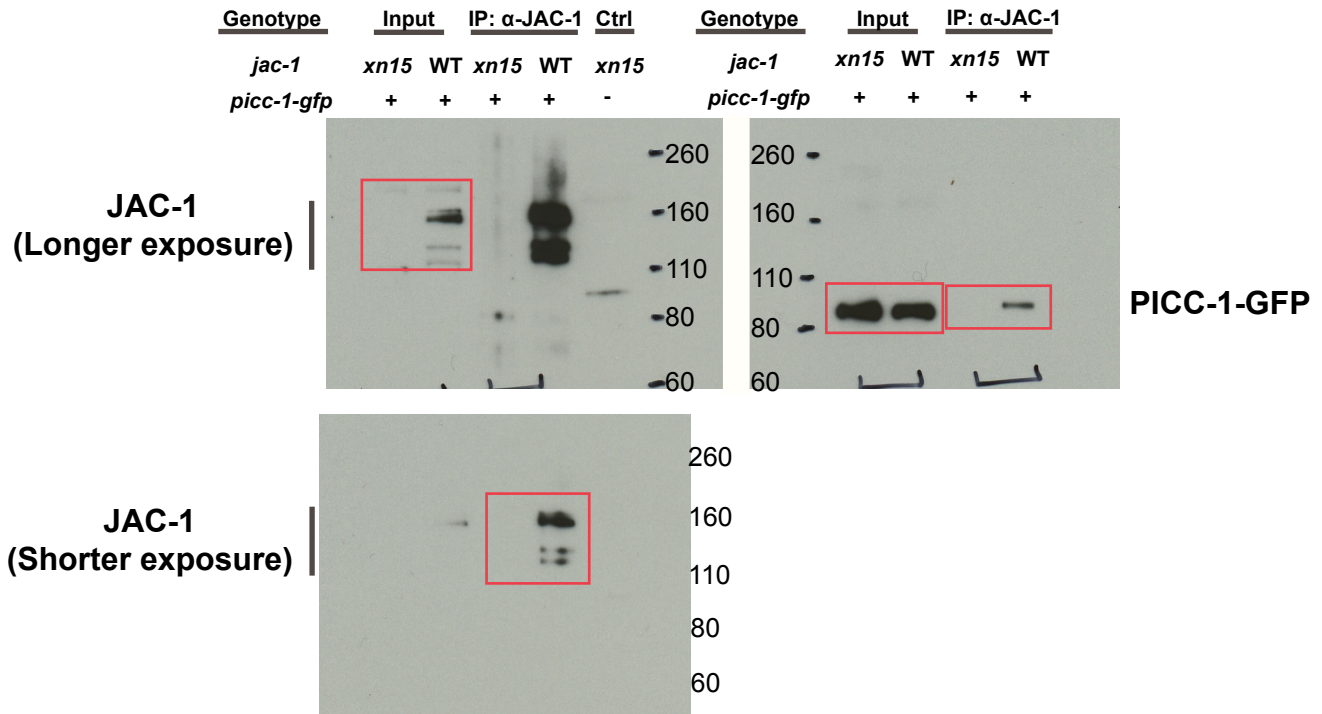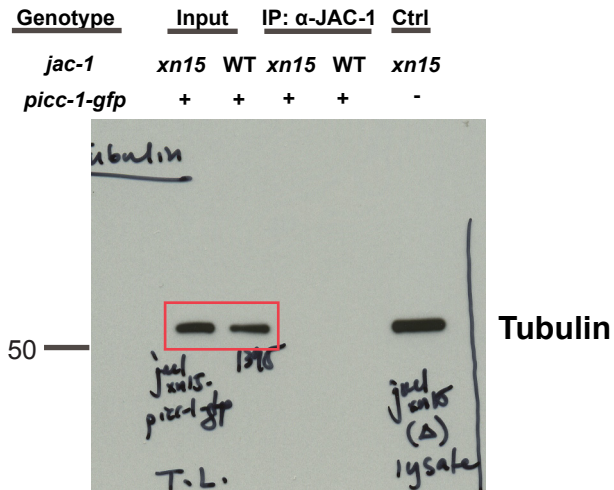

# Panels for Figure 5c

| Genotype            | Input |   |   | IP: α-GFP |   |   |
|---------------------|-------|---|---|-----------|---|---|
| <i>mCh-ha-pac-1</i> | -     | + | + | -         | + | + |
| <i>picc-1-gfp</i>   | -     | - | + | -         | - | + |

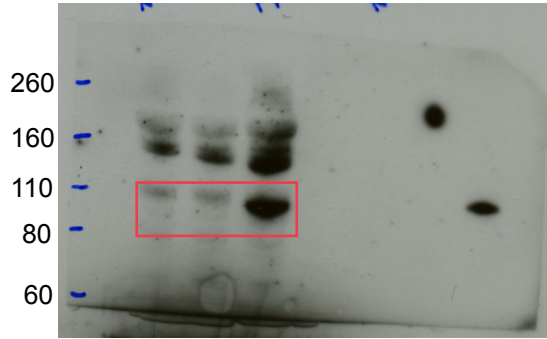

PICC-1-GFP (Shorter exposure)

| Genotype            | Input |   |   | IP: α-GFP |   |   |
|---------------------|-------|---|---|-----------|---|---|
| <i>mCh-ha-pac-1</i> | -     | + | + | -         | + | + |
| <i>picc-1-gfp</i>   | -     | - | + | -         | - | + |

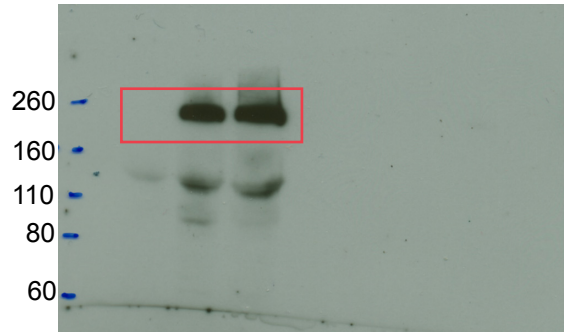

mCh-HA-PAC-1 (Shorter exposure)

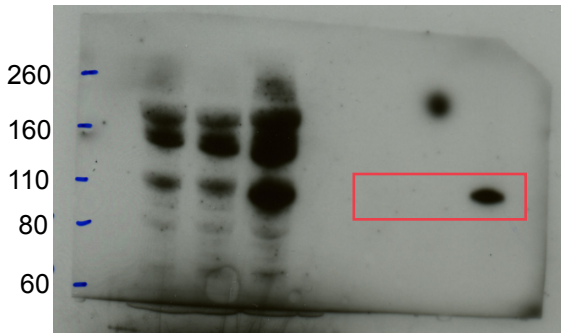

PICC-1-GFP (Longer exposure)

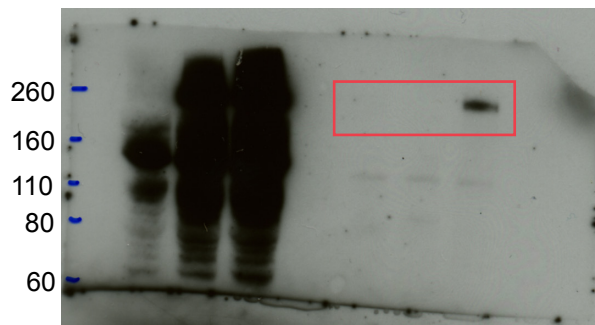

mCh-HA-PAC-1 (Longer exposure)

| Genotype            | Input |   |   | IP: α-GFP |   |   |
|---------------------|-------|---|---|-----------|---|---|
| <i>mCh-ha-pac-1</i> | -     | + | + | -         | + | + |
| <i>picc-1-gfp</i>   | -     | - | + | -         | - | + |

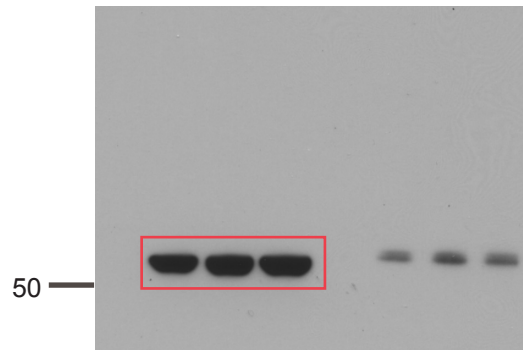

Tubulin

# Panels for Supplementary Figure 7b

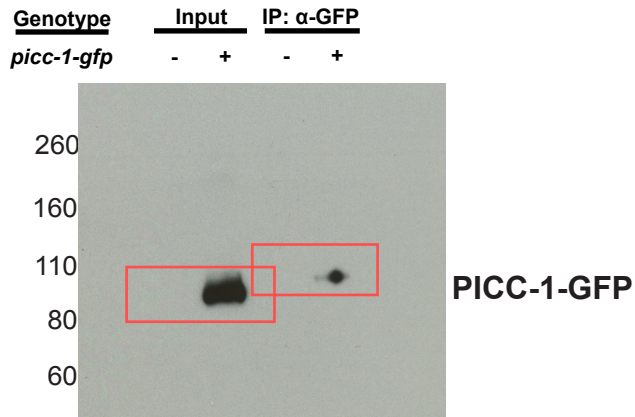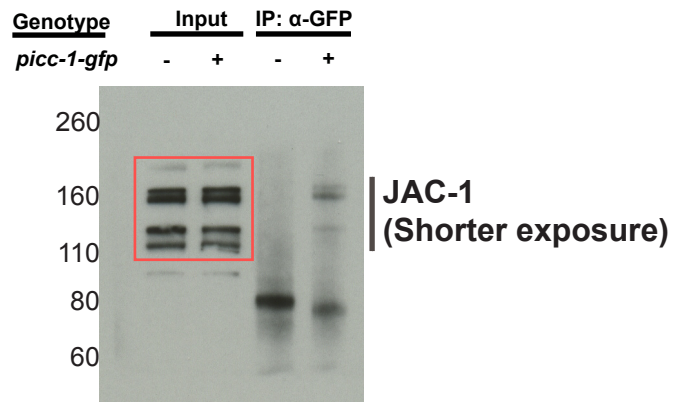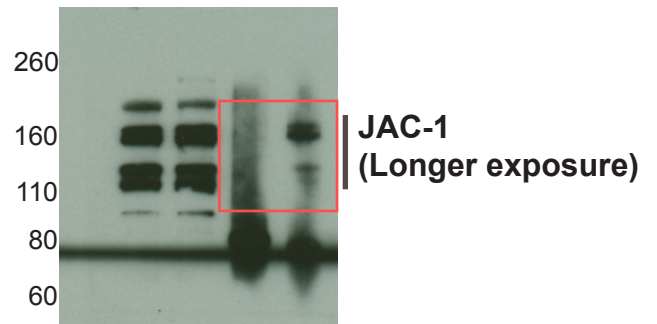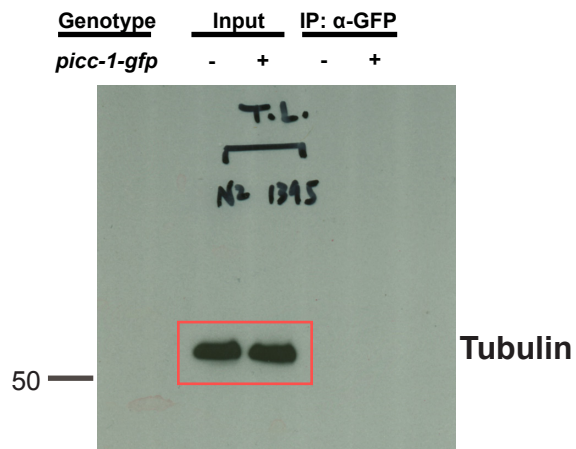

# Panels for Supplementary Figure 7c

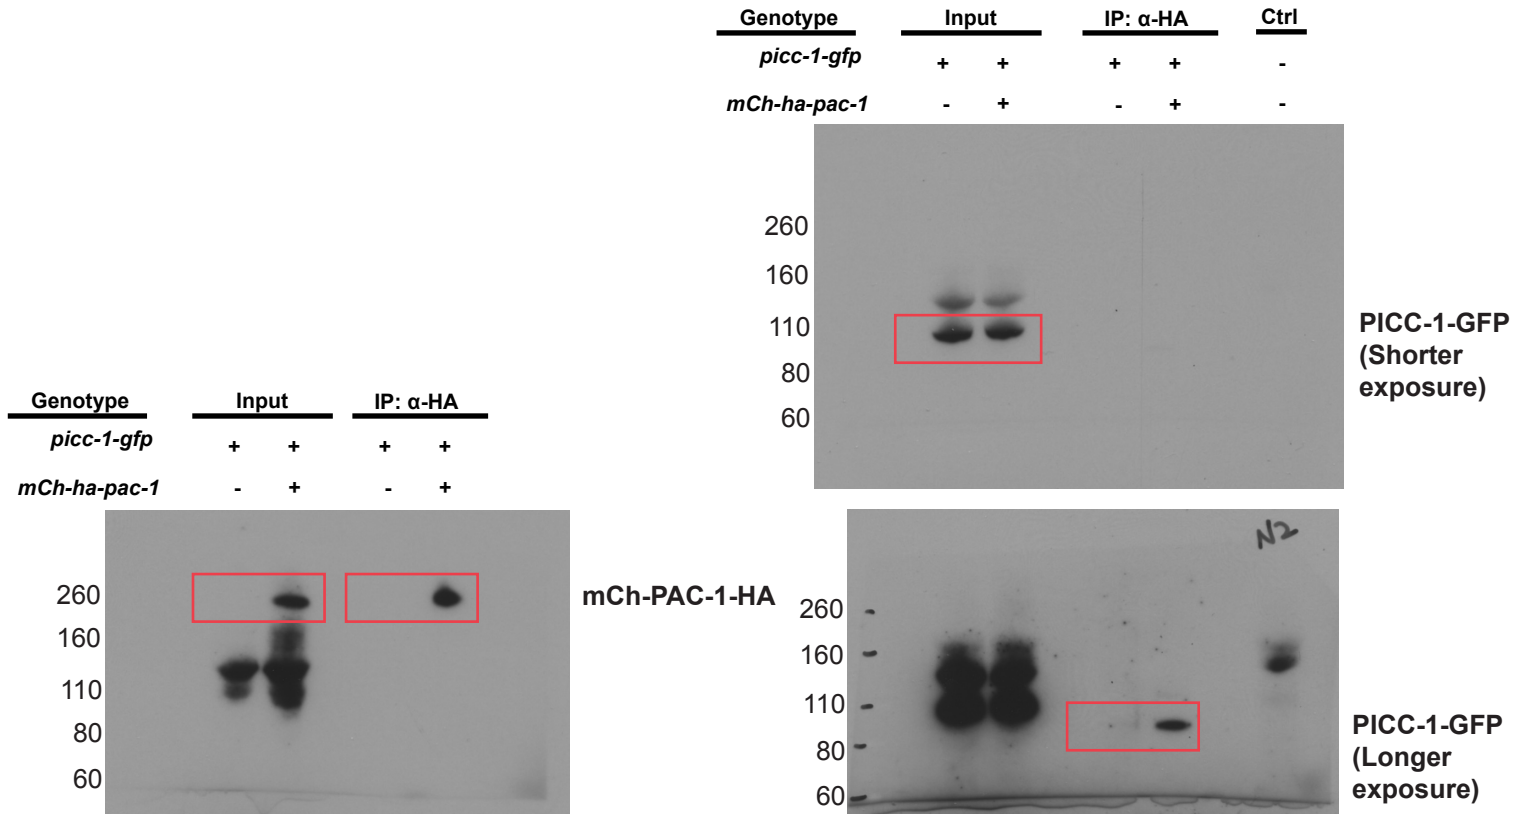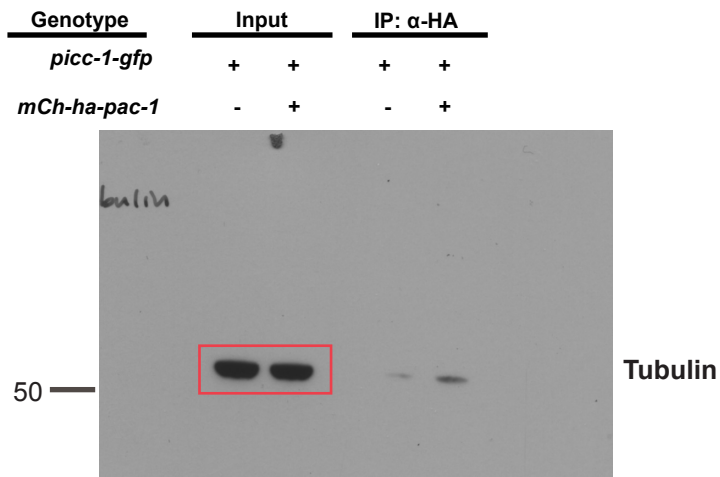

Supplement: NIHMS675683-supplement-8.pdf [file NIHMS675683-supplement-8.pdf]
